# Supplementary material
Source: PubMed Central journal article supplement (PMC2910263)
Supplement: emboj2010112s1.pdf [file emboj2010112s1.pdf]

## **SUPPLEMENTARY INFORMATION**

### **Phosphorylation of Mcl-1 by CDK1-cyclin B1 initiates its Cdc20-dependent destruction during mitotic arrest**

**Margaret E. Harley, Lindsey A. Allan, Helen S. Sanderson and Paul R. Clarke**

#### **SUPPLEMENTARY EXPERIMENTAL PROCEDURES**

##### *Antibodies and reagents*

The following antibodies were used for immunoblotting according to standard protocols: total caspase-3 (Santa Cruz Biotechnology); Bcl-x<sub>L</sub>, Bim (Cell Signalling); Noxa (AbCam). Histone H3 phospho-Ser10 (Millipore) was used for flow cytometry. The caspase inhibitor, Z-VAD-FMK (Biomol), was used at 10 μM for 2 h prior to further treatment. Staurosporine (Calbiochem) was used at 3 μM for 5 h.

##### *Determination of mitotic index by flow cytometry*

Ser10 phospho-histone H3 analysis by flow cytometry was carried out as described previously (Allan & Clarke, 2007).

#### **FIGURE LEGENDS**

**Supplementary Figure 1.** Mcl-1 depletion sensitizes U2OS cells to nocodazole-induced apoptosis. Mcl-1 was depleted from U2OS cells using siRNA. After 48 h, cells were treated with 250 ng/ml nocodazole for a further 48 h or left untreated. Sub-G1 DNA content (<2*N*) of asynchronous (As) and nocodazole-treated cells (Noc) was analysed by flow cytometry.

The percentage of apoptotic cells (boxed) was greater in cells depleted of Mcl-1 compared to control siRNA (Luc), nocodazole-treated cells. The efficiency of Mcl-1 depletion at 48 h was determined by Western blotting (lower panel).

**Supplementary Figure 2.** Mitotic arrest is maintained in synchronised U2OS cells. U2OS cells were treated with 100 ng/ml nocodazole for 2 h. Mitotic cells were isolated and re-plated for a further 2 or 4 h so that cells were arrested in mitosis for a total of 2, 4 or 6 h. Then floating cells were collected together with any adherent cells before the mitotic index (% , boxed) was determined by flow cytometry, using Ser10 phospho-histone H3 as a marker of mitosis. The majority of cells collected after 2 h nocodazole treatment are mitotic (75%) and this is maintained at each subsequent time point, demonstrating that cells synchronized in mitotic arrest by this protocol do not slip out of mitosis but remain arrested in mitosis.

**Supplementary Figure 3.** Bcl-2 and Bcl-x<sub>L</sub> are not degraded during mitotic arrest. U2OS cells were synchronised in mitosis by the 2 h nocodazole treatment and re-plating protocol. Cell lysates were immunoblotted for Bcl-2 and Bcl-x<sub>L</sub>.

**Supplementary Figure 4.** Mitotic degradation of endogenous Mcl-1 is not caspase dependent. U2OS cells were treated with 10 µM caspase inhibitor Z-VAD-FMK for 2 h, prior to mitotic arrest with 100 ng/ml nocodazole (Noc) (upper panels). As a positive control to confirm the efficacy of Z-VAD-FMK, a broad spectrum protein kinase inhibitor, staurosporine (STS), was used to induce apoptosis. In this case, U2OS cells were treated with 10 µM Z-VAD-FMK for 2 h, before addition of 3 µM STS for 5 h (lower panels). Samples were analysed by immunoblotting. Z-VAD-FMK failed to inhibit the destruction of Mcl-1 in

nocodazole-arrested cells, but did inhibit the cleavage of caspase-3 in response to staurosporine.

**Supplementary Figure 5.** Specificity of antibodies generated against Mcl-1 phosphorylation sites. Antibodies were tested against BSA-conjugated phosphopeptides. Dot blots show that pT92 Mcl-1 and pS64 Mcl-1 are specific to their phosphorylated peptides and do not recognise the corresponding non-phosphorylated peptides or BSA.

**Supplementary Figure 6.** Phosphorylation of Mcl-1 at Thr92 and Ser64 during the cell cycle. U2-Mcl-1-WT cells were synchronised at the G1/S boundary by double thymidine block then released into the cell cycle. Samples were analysed by SDS-PAGE and immunoblotting at the times indicated after release from the block. Asynchronous (As) and nocodazole-arrested (NM) samples are shown for comparison. Phosphorylation of both Thr92 and Ser64 was detected in samples enriched with mitotic cells (10-16 h), as indicated by phosphorylated Ser10 of histone H3.

**Supplementary Figure 7.** Mcl-1 is phosphorylated at Thr92 in mitosis and during mitotic arrest. Endogenous Mcl-1 was immunoprecipitated from U2OS cells growing in asynchronous culture (As), mitotic cells harvested by wash off (M) or from cells following treatment with nocodazole (100 ng/ml) for 2 h prior to separation of mitotic (NM) and adherent (NA) cells. Immunoprecipitates were immunoblotted for Mcl-1 phosphorylated at Thr92 or total Mcl-1. Total cell lysates used for the precipitations are shown (Input). Phosphorylation of Mcl-1 at Thr92 was detected only in mitotic cells: both during normal mitosis and during mitotic arrest following nocodazole treatment.

**Supplementary Figure 8.** Flow cytometry profiles of data from one experiment contained in graph in Figure 8A. U2-Mcl-1-WT, U2-Mcl-1-T92A, U2-Mcl-1-S64A and U2-eV cells were treated with 250 ng/ml nocodazole for 45 h. Flow cytometry was used to measure sub-G1 (<2*N*) DNA content (% , boxed) of asynchronous and nocodazole-treated cells. Cells expressing the T92A mutant of Mcl-1 are resistant to nocodazole-induced apoptosis.

**Supplementary Figure 9.** Cells expressing the D-box mutant of Mcl-1 are resistant to nocodazole-induced apoptosis. U2-Mcl-1-WT, U2-Mcl-1-D-box and U2-Mcl-1- $\Delta$ IR cells were treated with 250 ng/ml nocodazole for 45 h. Flow cytometry was used to measure sub-G1 (<2*N*) DNA content (% , boxed) of asynchronous and nocodazole-treated cells.

**Supplementary Figure 10.** U2OS cells stably transfected with Mcl-1 (WT, T92A or D-box mutant) were treated with nocodazole (250 ng/ml) for 45 h. Cells were analysed for sub-G1 DNA content by flow cytometry (+/- SEM, n=3). Statistical analyses were performed using a two-tailed unpaired Student's *t*-test. The percentage of cells with sub-G1 DNA content in T92A or D-box mutant cells was significantly different from WT (p<0.002). The expression level of Mcl-1 WT, T92A or D-box mutant proteins was determined by Western blotting (lower panel).

**Supplementary Figure 11.** Phosphorylation of Mcl-1 at Ser64 and Thr92 does not affect binding to Noxa or Bim. The co-precipitation of proteins with Flag-Mcl-1 was examined in U2-Mcl-1-WT, U2-Mcl-1-T92A, U2-Mcl-1-S64A and U2-eV cells in asynchronous culture (left panels) or treated with 10  $\mu$ M MG132 for 2 h, prior to addition of 100 ng/ml nocodazole (Noc) for 4 h (right panels). The cell lysates (Input) and Flag-tagged Mcl-1 immunoprecipitates (Flag IP) were analysed by SDS-PAGE and immunoblotting with the

specified antibodies. Association of the pro-apoptotic proteins Noxa and Bim with Mcl-1 was not inhibited by the T92A or S64A phosphorylation site mutants of Mcl-1, even when phosphorylated Mcl-1 was stabilized in cells arrested in mitosis.

## SUPPLEMENTARY FIGURES

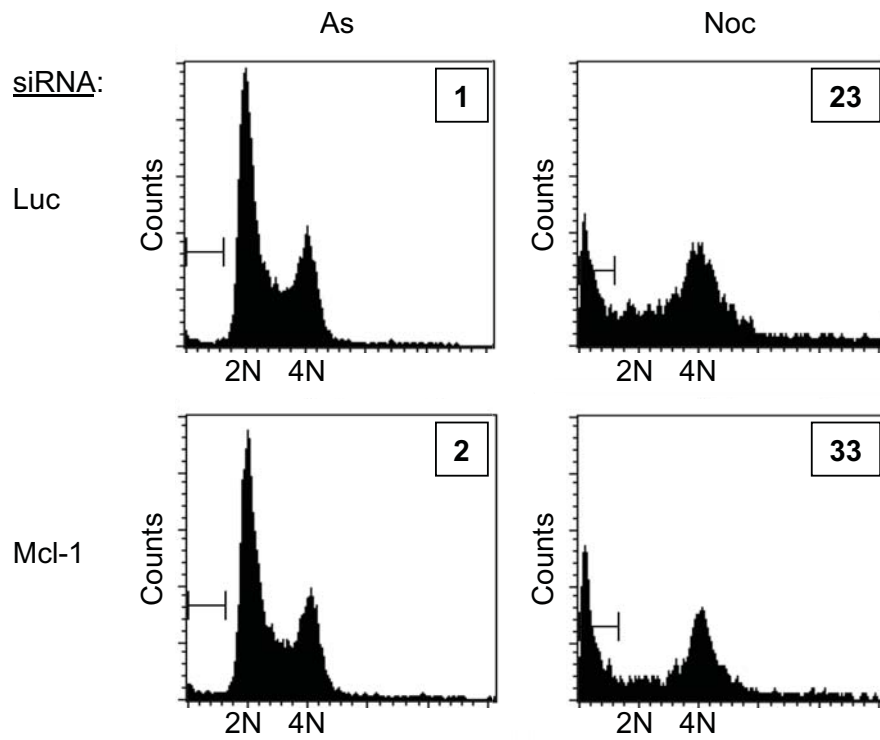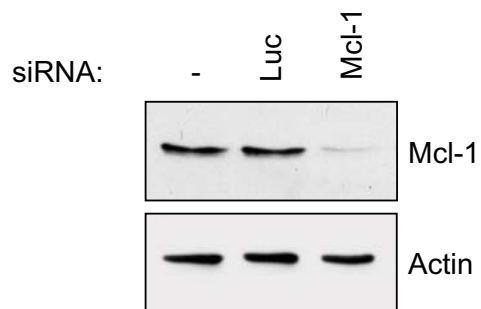

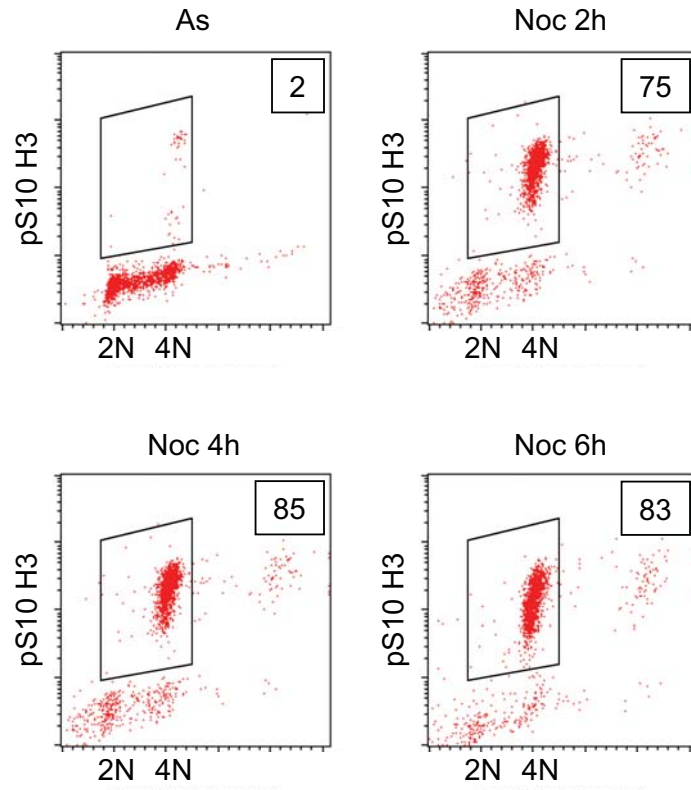

Supplementary Figure 2

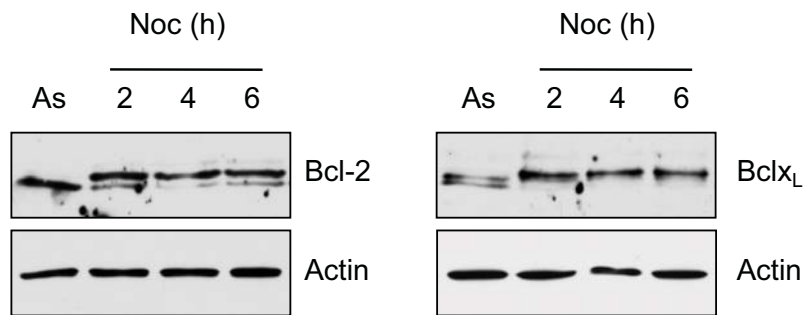

Supplementary Figure 3



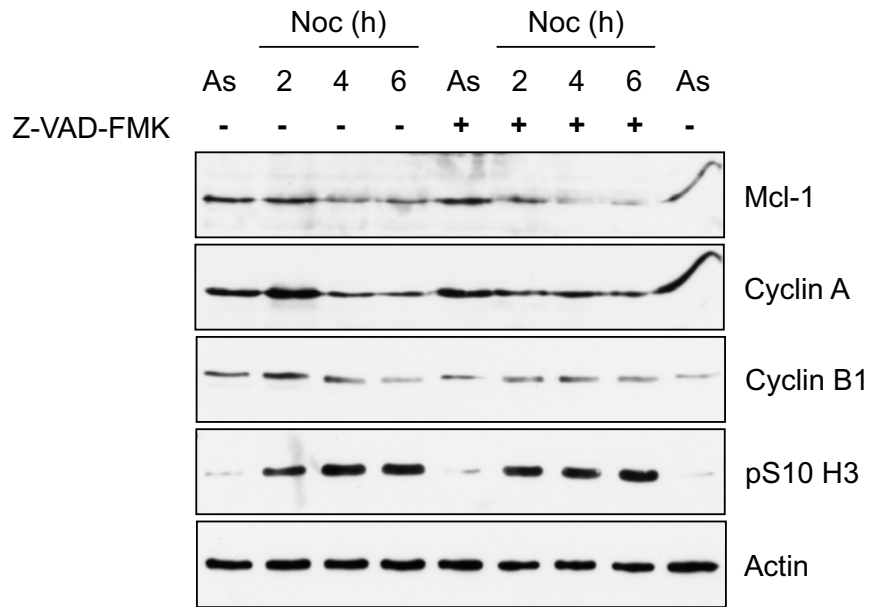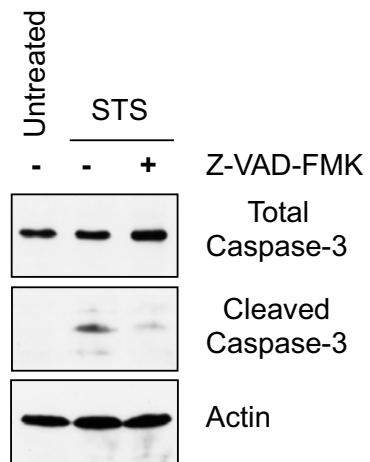

Supplementary Figure 4

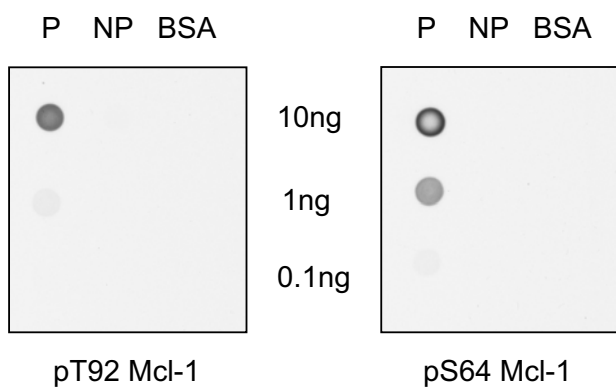

Supplementary Figure 5

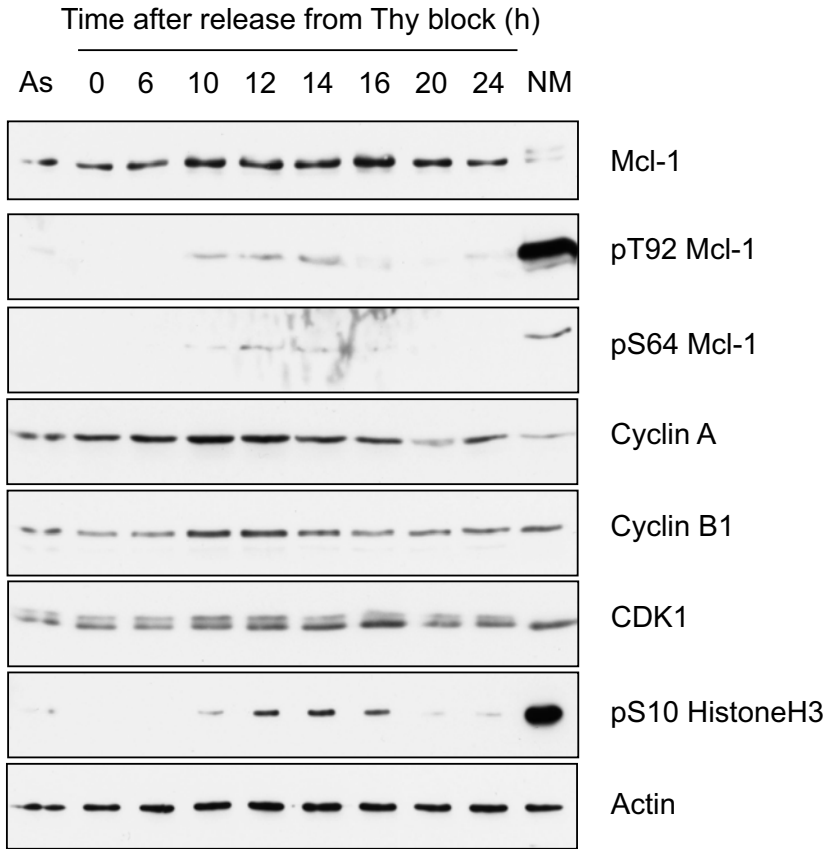

Supplementary Figure 6

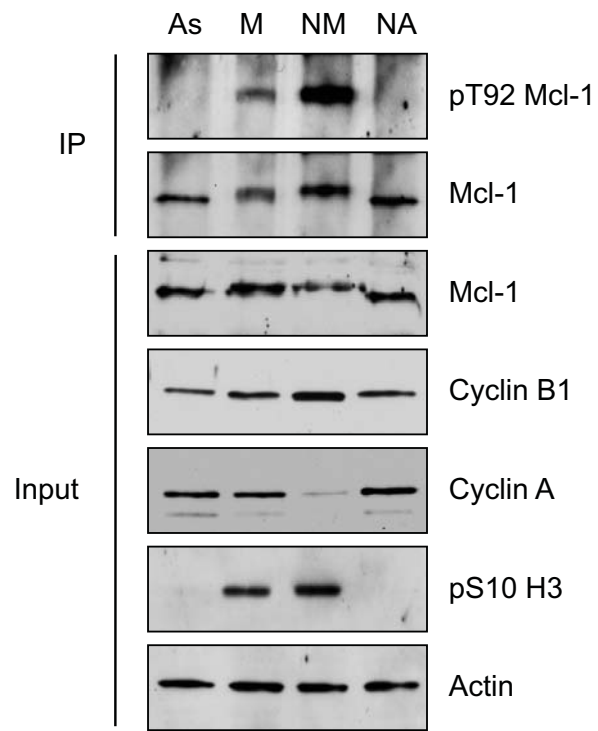

Supplementary Figure 7

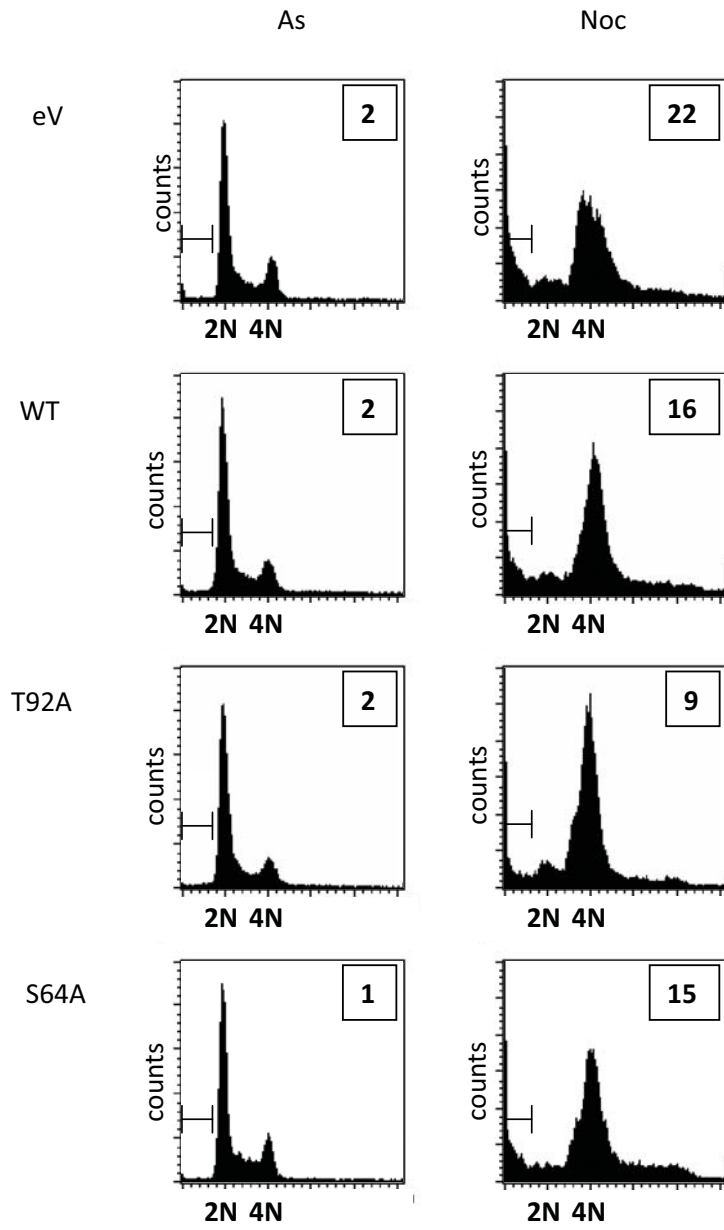

Supplementary Figure 8

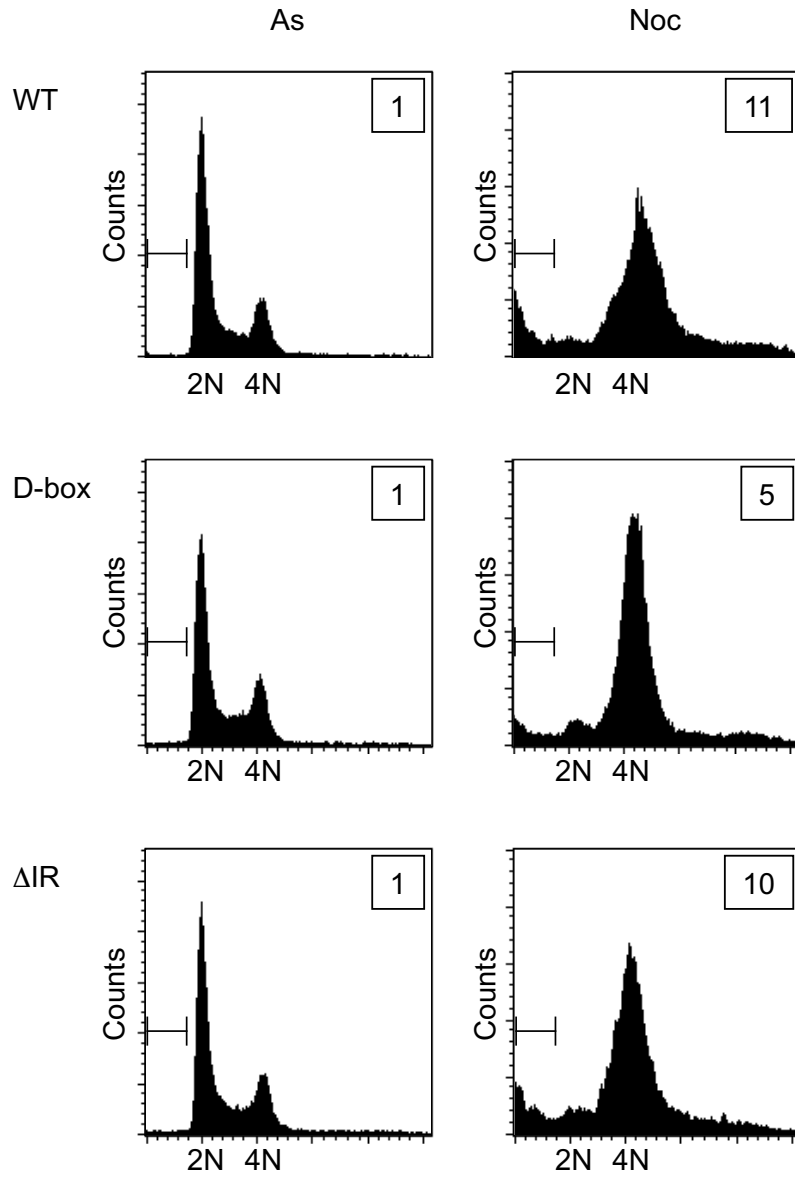

Supplementary Figure 9

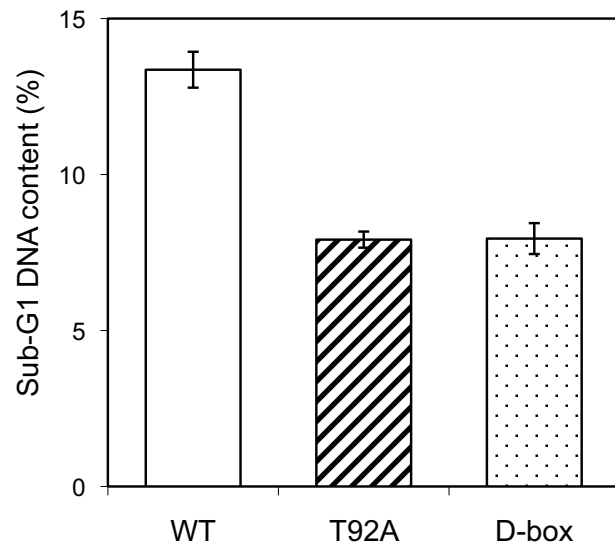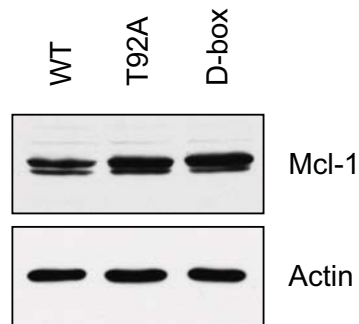

Supplementary Figure 10

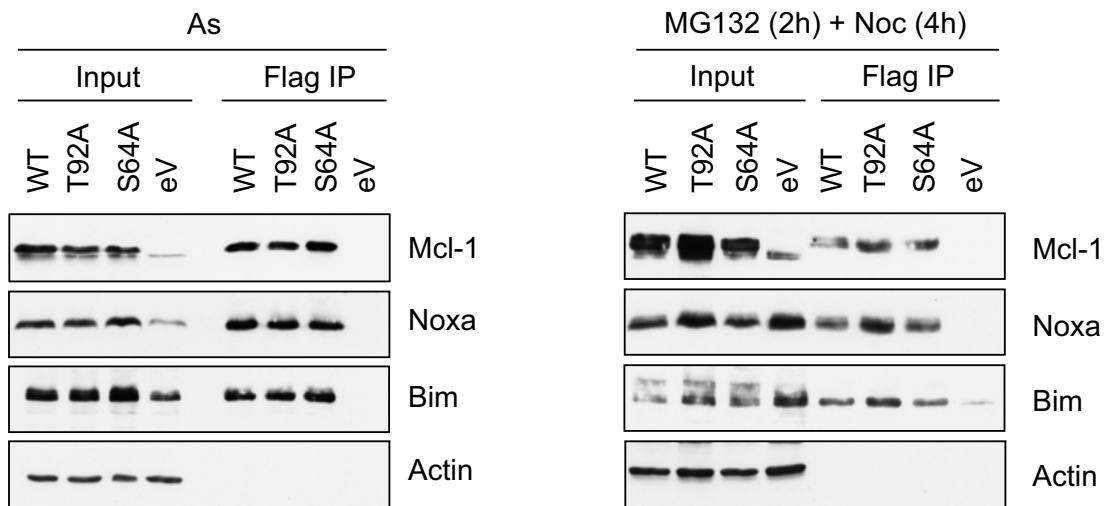

Supplementary Figure 11
